# Supplementary material for: Genomic and metabolic adaptations of biofilms to ecological windows of opportunity in glacier-fed streams
Source: PubMed Central journal article supplement (PMC9021309; doi:10.1038/s41467-022-29914-0), 2022-04-20
Supplement: 41467_2022_29914_MOESM3_ESM.pdf [file 41467_2022_29914_MOESM3_ESM.pdf]

## Description of Additional Supplementary Files

### Title: Supplementary Data 1

**Description:** CAZyme abundances Normalised abundances of the carbohydrate-active enzymes (CAZymes) across all samples. AA: auxilliary activities, CBM: non-catalytic carbohydrate-binding modules, CE: carbohydrate esterases, GH: glycoside hydrolases, GT: glycosyltransferases, PL: polysaccharide lyases, and SLH: S-layer homology domain enzymes.

### Title: Supplementary Data 2

**Description:** Public metagenomes Metadata including ecosystems and location of the publicly-available metagenomes used for comparing Kyoto Encyclopedia of Genes and Genomes (KEGG) orthologs.

### Title: Supplementary Data 3

**Description:** Enriched KEGG orthologs in epilithic biofilms. KEGG orthology (KO) genes enriched in epilithic biofilms compared to other metagenomic datasets. Gene enrichment was assessed using DEseq2, where the adjusted p-value < 0.05 was considered to be significant.

### Title: Supplementary Data 4

**Description:** COG functions enriched in GFS Polaromonas spp.. Clustered-orthologous genes (COG20) functions enriched in Polaromonas spp. compared to genomes available via RefSeq. Gene enrichment was assessed using DEseq2, where the adjusted p-value < 0.05 was considered to be significant.

### Title: Supplementary Data 5

**Description:** Sample metadata. Sample metadata including physico-chemical parameters such as pH, turbidity, conductivity, dissolved organic carbon, temperature, and CO2 saturation.

### Title: Supplementary Data 6

**Description:** Accession information. NCBI sequence read archive (SRA) accession IDs for all samples used in the study including hyperlinks for each sample.

### Title: Supplementary Data 7

**Description:** Osmotic stress genes Gene counts for osmotic stress found in respective Phyla.
